# Supplementary material for: Smith–Magenis syndrome protein RAI1 regulates body weight homeostasis through hypothalamic BDNF-producing neurons and neurotrophin downstream signalling
Source: eLife journal article supplement (doi:10.7554/elife.90333), 2023-08-23

Uncropped western blots for staining against antibodies for P-AKT & AKT. The membrane was stripped to stain for AKT after staining for p-AKT. Before staining, the membrane was cut at band 72KDa and below 53 KDa. The yellow box represents the cropped region for images shown in this manuscript.

**Set 1 & 2: Figure 5—figure supplement 1**

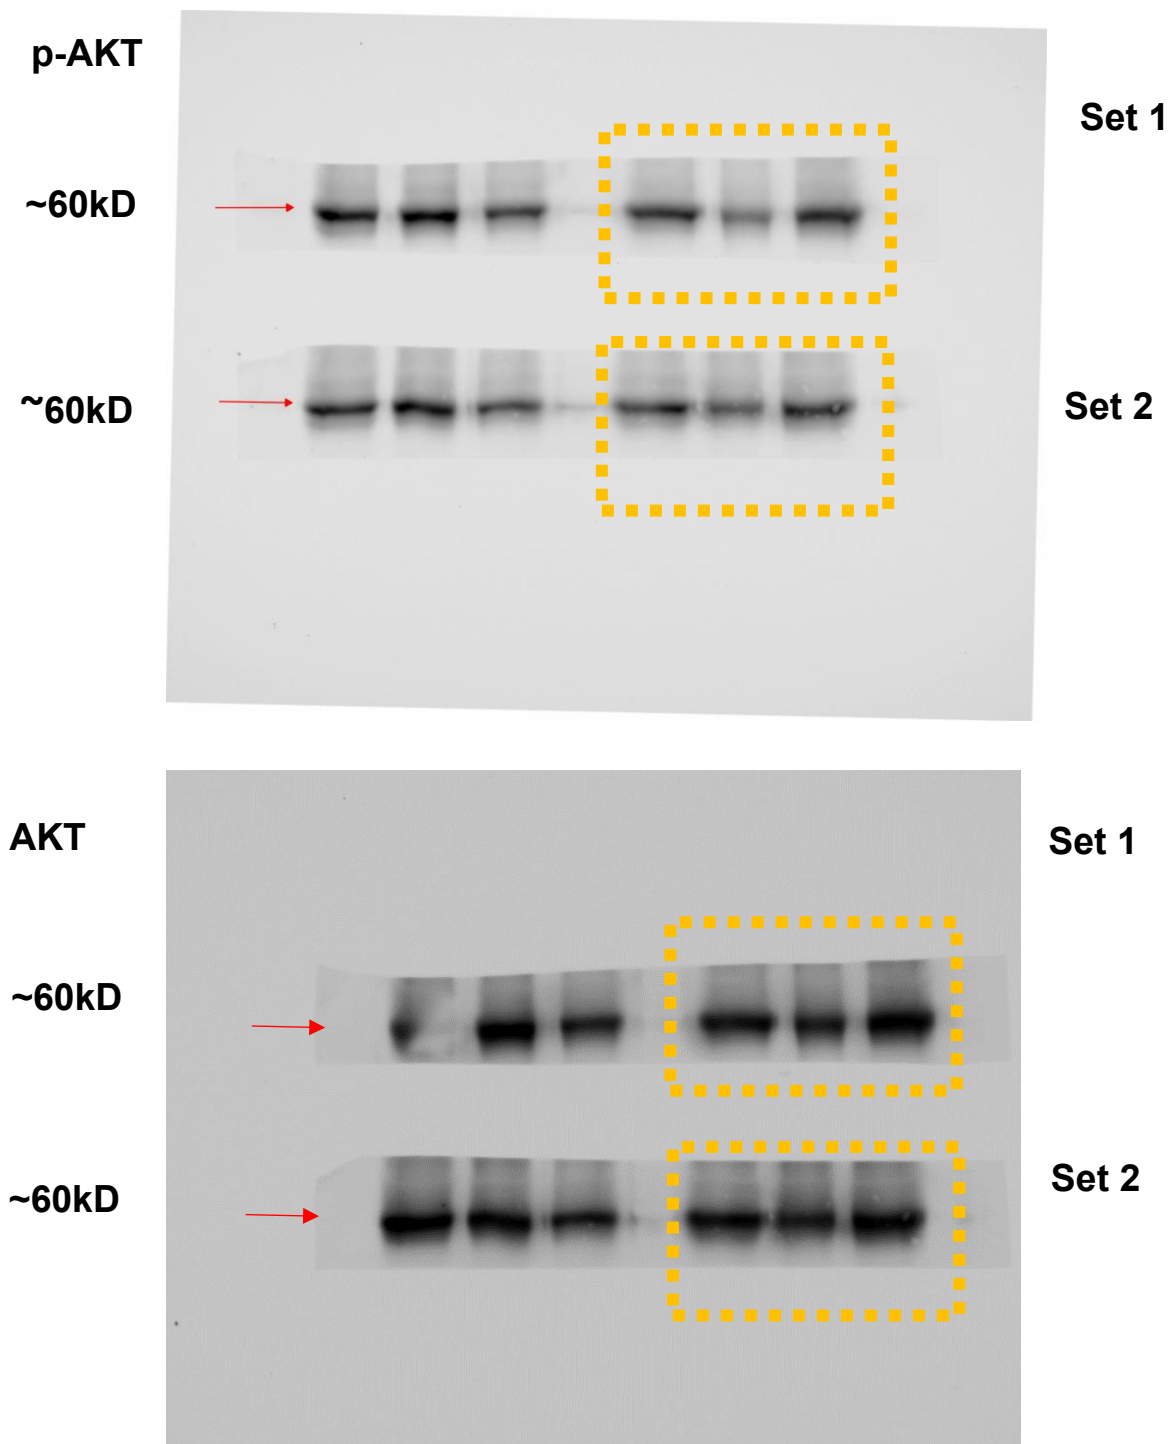

Figure 5A & Set 3: Figure 5—figure supplement 1

p-AKT

~60kD

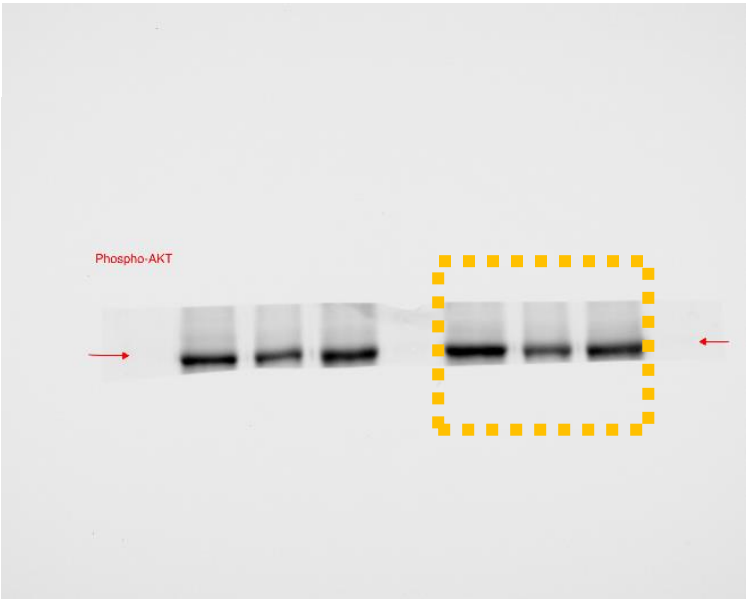

AKT

~60kD

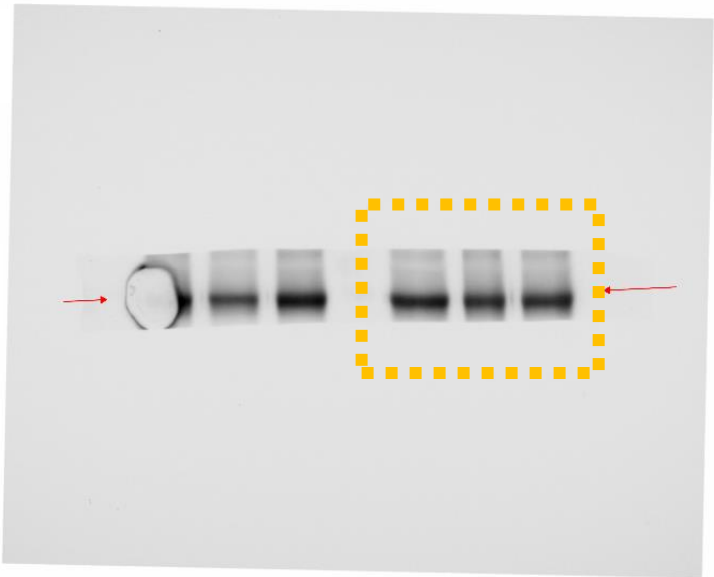

Set 4: Figure 5—figure supplement 1

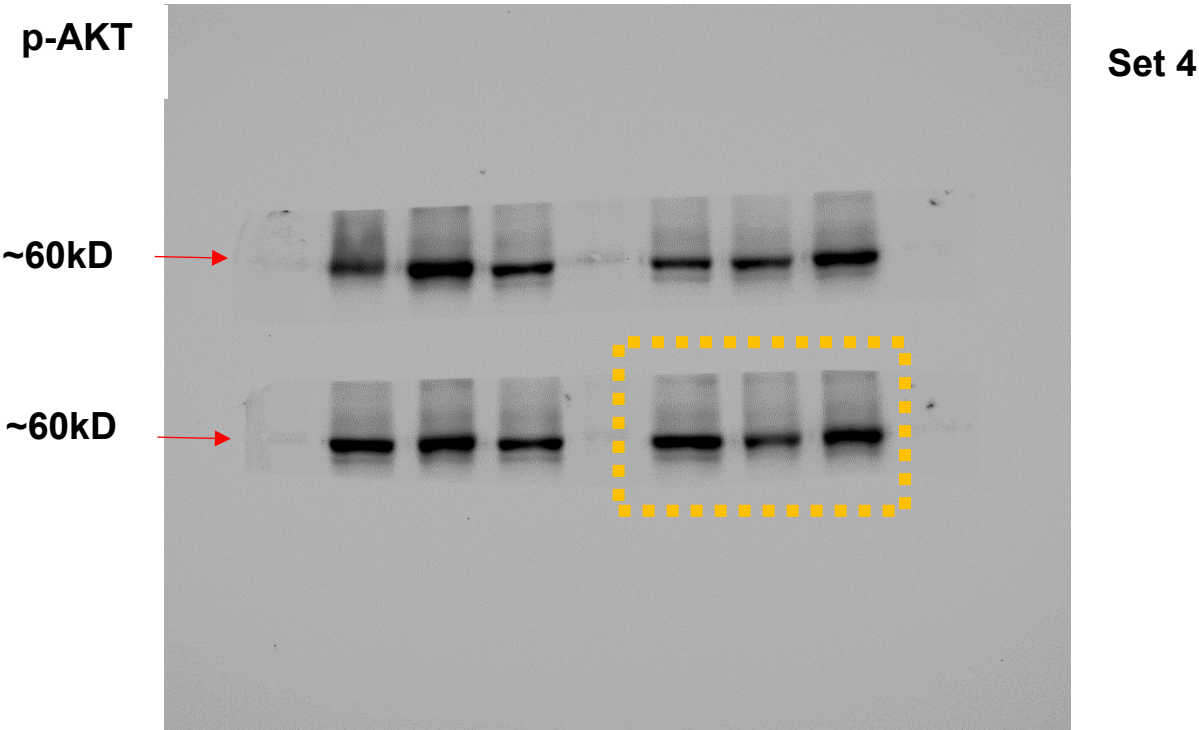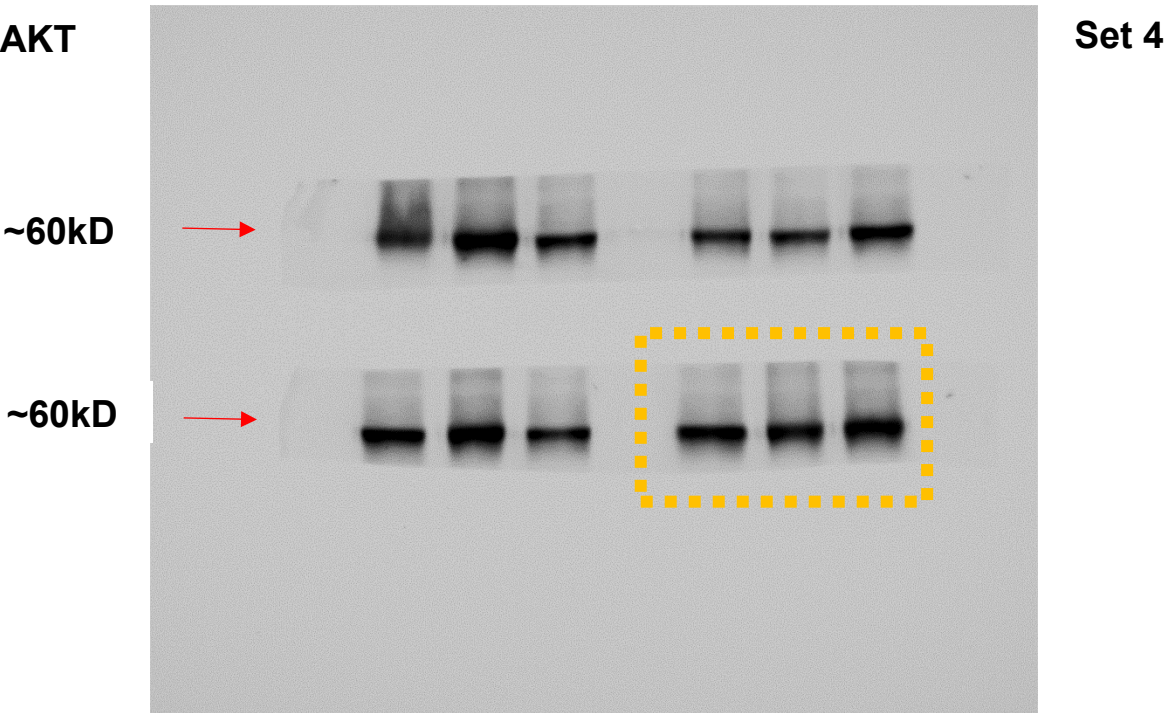

Supplement: fig5-figsupp1-data1 [file elife-90333-fig5-figsupp1-data1-v1.zip]
